# Supplementary material
Source: ML conference proceedings conference paper supplement (https://openaccess.thecvf.com/content/CVPR_2020/html/Quan_Self2Self_With_Dropout_CVPR_2020_paper.html)
Supplement: Supplementary file 1 [file Quan_Self2Self_With_Dropout_CVPR_2020_supplemental.pdf]

# Supplementary Materials

Yuhui Quan<sup>1</sup>, Mingqin Chen<sup>1</sup>, Tongyao Pang<sup>2</sup> and Hui Ji<sup>2</sup>

<sup>1</sup>School of Computer Science and Engineering, South China University of Technology, Guangzhou 510006, China

<sup>2</sup>Department of Mathematics, National University of Singapore, 119076, Singapore

csyhquan@scut.edu.cn, csmingqinchen@mail.scut.edu.cn, matpt@nus.edu.sg and matjh@nus.edu.sg

## 1. Details on Partial Convolution

Partial convolution [1] is originally designed for inpainting image holes, which allows progressively filling the holes from the outside to the inside. Let  $\mathbf{k} \in \mathbb{R}^Z$  be the weights of a convolution kernel and  $b \in \mathbb{R}$  the corresponding bias. Let  $\mathbf{f} \in \mathbb{R}^Z$  denote the feature values (pixels values) for the current convolution (sliding) window and  $\mathbf{m} \in \mathbb{R}^Z$  is the corresponding binary mask. The partial convolution at every location is expressed as

$$\mathbf{f}' = 1[\|\mathbf{m}\|_1 > 0](\mathbf{k}^\top (\mathbf{f} \odot \mathbf{m}) \frac{Z}{\|\mathbf{m}\|_1} + b), \quad (1)$$

where  $\odot$  is the Hadamard's product. It can be seen that the output of the function only depends on the unmasked inputs. The scaling factor  $\frac{Z}{\|\mathbf{m}\|_1}$  applies appropriate scaling to adjust for the varying amount of valid (unmasked) inputs. At the beginning, we initialize the mask  $\mathbf{m}$  such that it excludes the dropped pixels of the input Bernoulli sampled instance as well as those of the input images (e.g. in removing salt-and-pepper noise). After crossing the current PConv layer, we then update the mask for the next PConv layer as follows: if the convolution was able to condition its output on at least one valid input value, then we mark that location to be valid. This can be expressed as  $\mathbf{m}' = 1[\|\mathbf{m}\|_1 > 0]$ , which can be easily implemented as a part of forward pass. See [1] for more details.

## 2. Proof of Proposition 1

*Proof.* Rewrite the loss function as follows:

$$\begin{aligned} \sum_{m=1}^M \|\mathcal{F}_\theta(\hat{\mathbf{y}}_m) - \bar{\mathbf{y}}_m\|_{\mathbf{b}_m}^2 &= \sum_{m=1}^M \|\mathcal{F}_\theta(\hat{\mathbf{y}}_m) - \mathbf{y}\|_{\mathbf{b}_m}^2 = \sum_{m=1}^M \|\mathcal{F}_\theta(\hat{\mathbf{y}}_m) - (\mathbf{x} + \mathbf{n})\|_{\mathbf{b}_m}^2 \\ &= \sum_{m=1}^M \|\mathcal{F}_\theta(\hat{\mathbf{y}}) - \mathbf{x}\|_{\mathbf{b}_m}^2 + \sum_{m=1}^M \|\mathbf{n}\|_{\mathbf{b}_m}^2 - 2 \sum_{m=1}^M ((\mathbf{1} - \mathbf{b}_m) \odot \mathbf{n})^\top (\mathcal{F}_\theta(\hat{\mathbf{y}}_m) - \mathbf{x}) \\ &= \sum_{m=1}^M \|\mathcal{F}_\theta(\hat{\mathbf{y}}) - \mathbf{x}\|_{\mathbf{b}_m}^2 + \sum_{m=1}^M \|\mathbf{n}\|_{\mathbf{b}_m}^2 - 2\mathbf{n}^\top \left( \sum_{m=1}^M (\mathbf{1} - \mathbf{b}_m) \odot (\mathcal{F}_\theta(\hat{\mathbf{y}}_m) - \mathbf{x}) \right). \end{aligned} \quad (2)$$

Regarding the second term in (2), its expectation is

$$\mathbb{E}_{\mathbf{n}} \left[ \sum_{m=1}^M \|\mathbf{n}\|_{\mathbf{b}_m}^2 \right] = \mathbb{E}_{\mathbf{n}} \left[ \sum_{m=1}^M \|(\mathbf{1} - \mathbf{b}_m) \odot \mathbf{n}\|_2^2 \right] = \sum_{m=1}^M \|(\mathbf{1} - \mathbf{b}_m) \odot \boldsymbol{\sigma}\|_2^2 = \sum_{m=1}^M \|\boldsymbol{\sigma}\|_{\mathbf{b}_m}^2. \quad (3)$$

Regarding the last term in (2), for simplicity we define

$$\mathbf{r} = \sum_{m=1}^M (\mathbf{1} - \mathbf{b}_m) \odot (\mathcal{F}_\theta(\hat{\mathbf{y}}_m) - \mathbf{x}) = \sum_{m=1}^M (\mathbf{1} - \mathbf{b}_m) \odot (\mathcal{F}_\theta(\mathbf{b}_m \odot \mathbf{x} + \mathbf{b}_m \odot \mathbf{n})) - \mathbf{x}. \quad (4)$$

Note that  $\mathcal{F}_\theta(\mathbf{b}_m \odot \mathbf{x} + \mathbf{b}_m \odot \mathbf{n})$  contributes to  $\mathbf{r}(i)$  only if  $\mathbf{b}_m(i) = 0$ . But in this case,  $\mathbf{n}(i)$  is erased by  $\mathbf{b}_m(i)$ . This means that  $\mathbf{n}(i)$  has no contribution to  $\mathbf{r}(i)$ . Together with that  $\mathbf{n}(i)$  is independent of  $\mathbf{n}(j)$  for any  $i \neq j$ , we can conclude that  $\mathbf{r}(i)$  is independent to  $\mathbf{n}(i)$  for all  $i$ . Therefore, we have

$$\mathbb{E}_{\mathbf{n}}[\mathbf{n}^\top \mathbf{r}] = (\mathbb{E}_{\mathbf{n}}[\mathbf{n}])^\top (\mathbb{E}_{\mathbf{n}}[\mathbf{r}]) = 0. \tag{5}$$

Combining (2), (3) and (5) yields

$$\begin{aligned} \mathbb{E}_{\mathbf{n}} \left[ \sum_{m=1}^M \|\mathcal{F}_\theta(\hat{\mathbf{y}}_m) - \bar{\mathbf{y}}_m\|_{\mathbf{b}_m}^2 \right] &= \mathbb{E}_{\mathbf{n}} \left[ \sum_{m=1}^M \|\mathcal{F}_\theta(\hat{\mathbf{y}}) - \mathbf{x}\|_{\mathbf{b}_m}^2 \right] + \mathbb{E}_{\mathbf{n}} \left[ \sum_{m=1}^M \|\mathbf{n}\|_{\mathbf{b}_m}^2 \right] - 2\mathbb{E}_{\mathbf{n}}[\mathbf{n}^\top \mathbf{r}] \\ &= \sum_{m=1}^M \|\mathcal{F}_\theta(\hat{\mathbf{y}}) - \mathbf{x}\|_{\mathbf{b}_m}^2 + \sum_{m=1}^M \|\boldsymbol{\sigma}\|_{\mathbf{b}_m}^2. \end{aligned} \tag{6}$$

The proof is done. □

### 3. More Results on Blind Gaussian Denoising

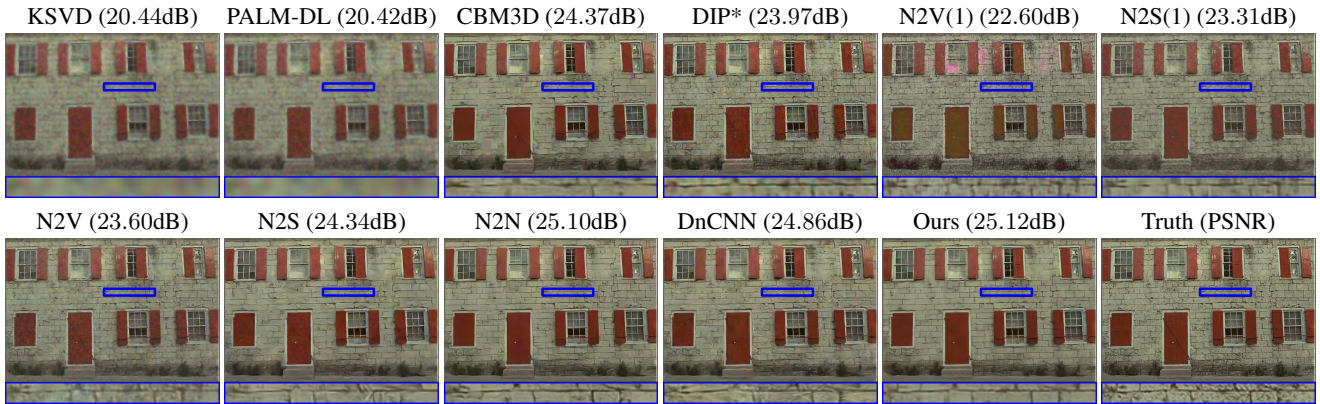

Figure 1: Visual results of blind AWGN denoising on image 'Kodim01' of Set9 with noise level  $\sigma = 75$ .

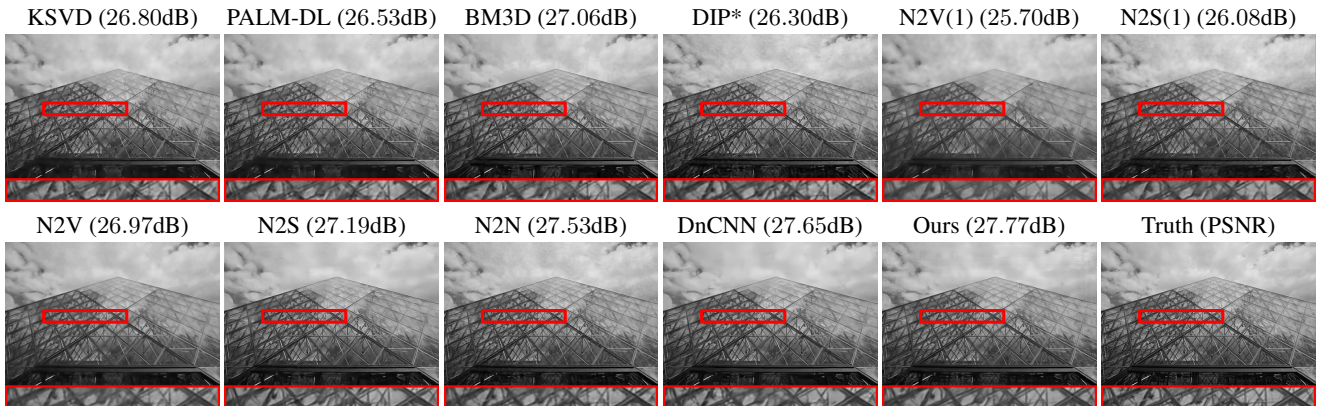

Figure 2: Visual results of blind AWGN denoising on image '223061' on BSD68 with noise level  $\sigma = 25$ .

#### 4. More Results on Removal of Real-World Image Noise

Due to space limitation, the quantitative results of N2V(1) and N2S(1) are not listed in Table 2 in our main paper. The following are their results. (a) N2V(1): PSNR=34.14dB, SSIM=0.95; (b) N2S(1): PSNR=34.69dB, SSIM=0.97. Also, regarding the visual comparison in Fig. 3 in our main paper, the results of some methods are not presented. For completeness, we show the results of all compared methods in Fig. 3. See also Fig. 4 for one more example on visual comparison.

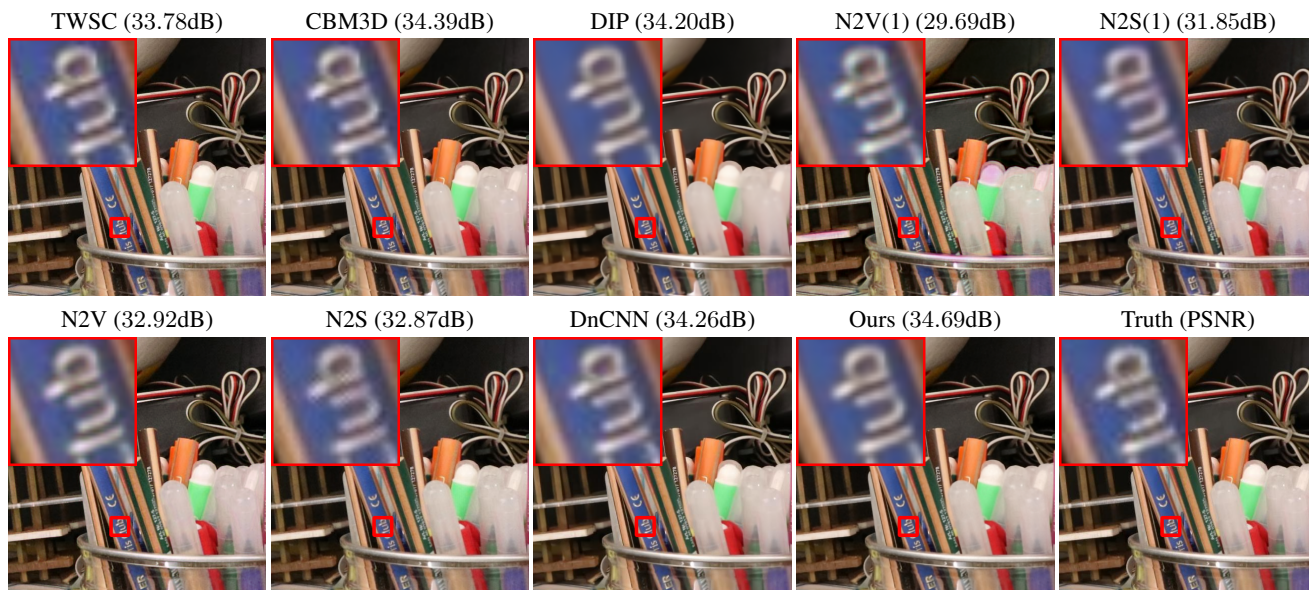

Figure 3: Denoising results on a real-world noisy image by different methods.

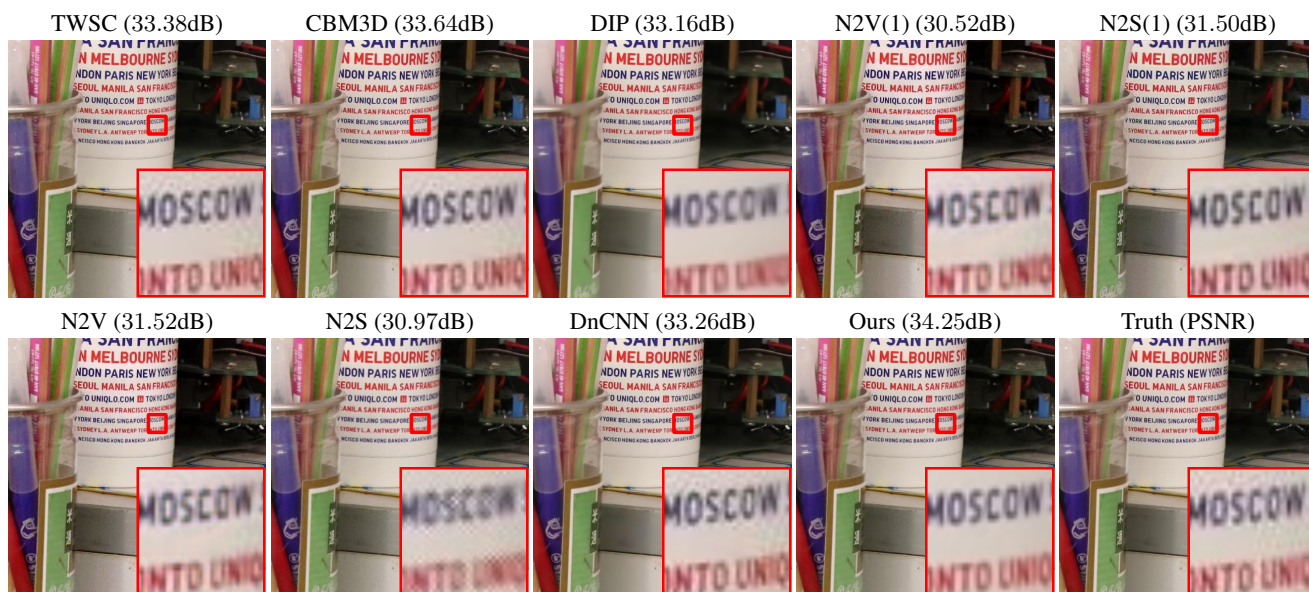

Figure 4: Denoising results on a real-world noisy image by different methods.

## References

- [1] Guilin Liu, Fitsum A Reda, Kevin J Shih, Ting-Chun Wang, Andrew Tao, and Bryan Catanzaro. Image inpainting for irregular holes using partial convolutions. In *Proc. ECCV*, pages 85–100, 2018. [1](#)
